# Supplementary material
Source: Springer Nature journal article supplement (https://www.springermedizin.de/resource/supplementary/12978_2011_119_MOESM2_ESM.pdf/9602894)

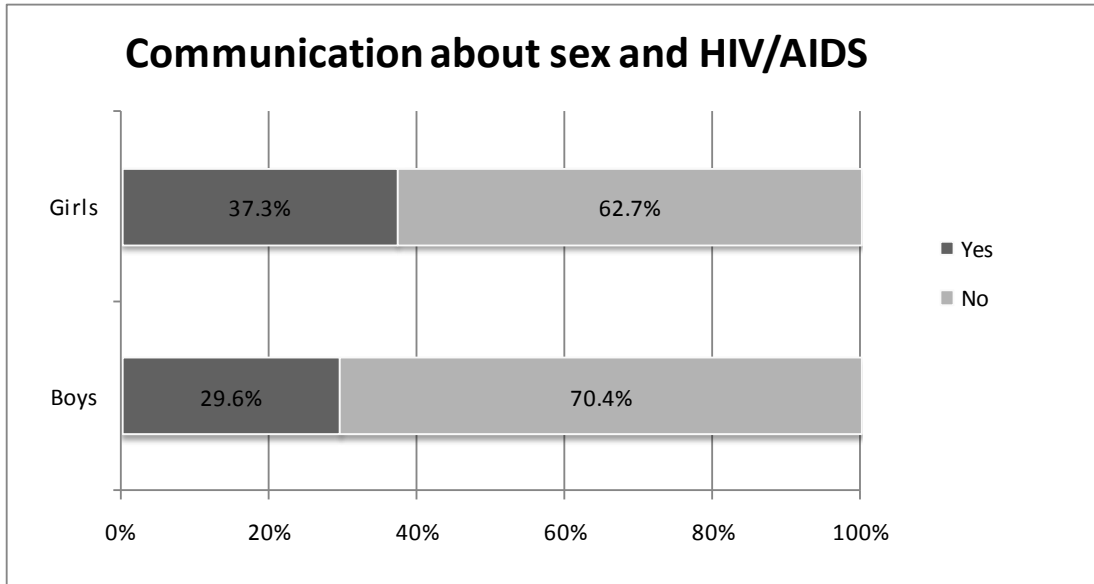

**Figure 2. Communication about sex and HIV/AIDS**

Supplement: MOESM2 [file 9602894]
